# Supplementary material
Source: MDPI journal article supplement (https://www.mdpi.com/2304-6740/7/9/110)
Supplement: s1 [file s1]

# Supplementary Materials: An Optimised Compaction Process for Zr-fumarate (MOF-801)

Marco Taddei, Matthew J. McPherson, Abel Gougsa, Jamie Lam, Jack Sewell and Enrico Andreoli

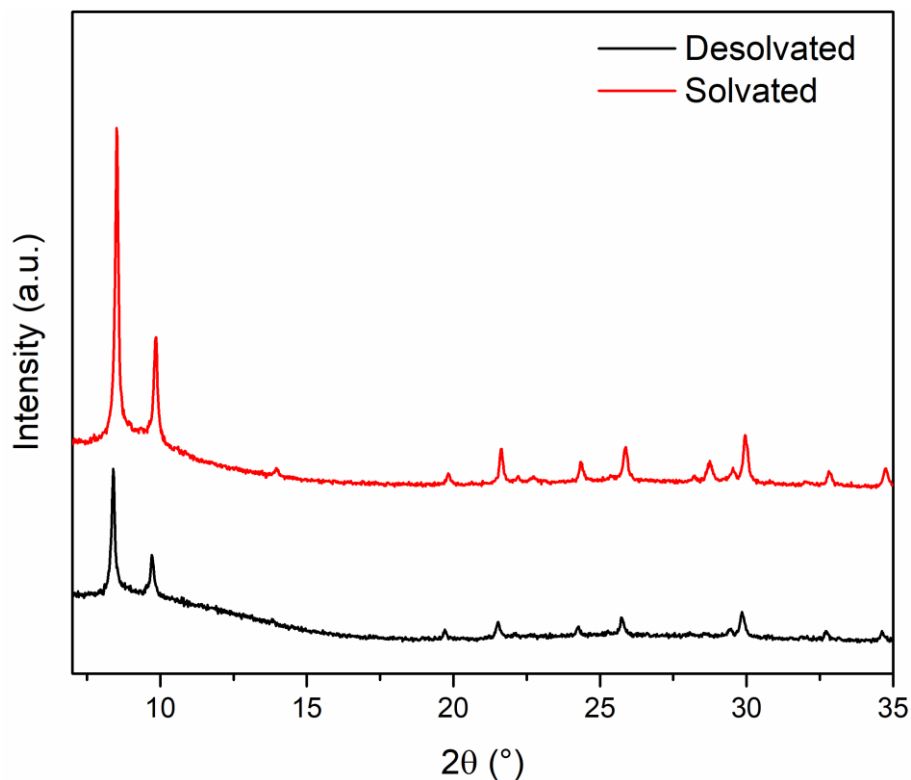

**Figure S1.** Powder X-ray diffraction patterns of the pellets prepared compressing at 438 MPa for 15 min 400 mg of MOF-801 held in an oven at 120 °C for 2 h prior to compression (black) and as-synthesised (red).

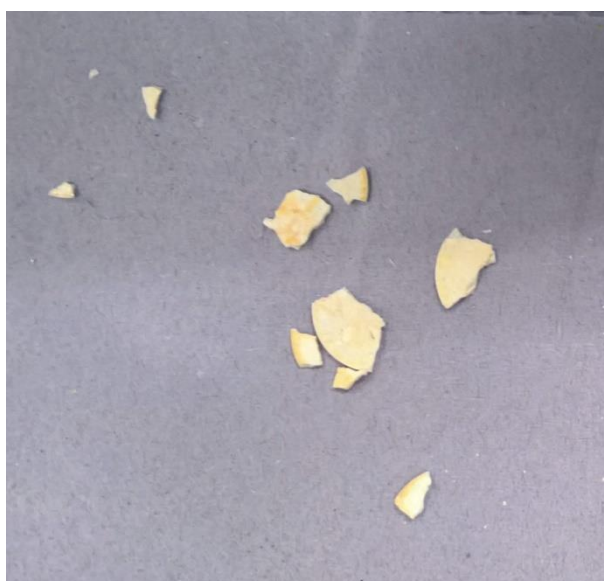

**Figure S2.** Typical fragmentation after drop tests of a pellet prepared compressing neat MOF-801.

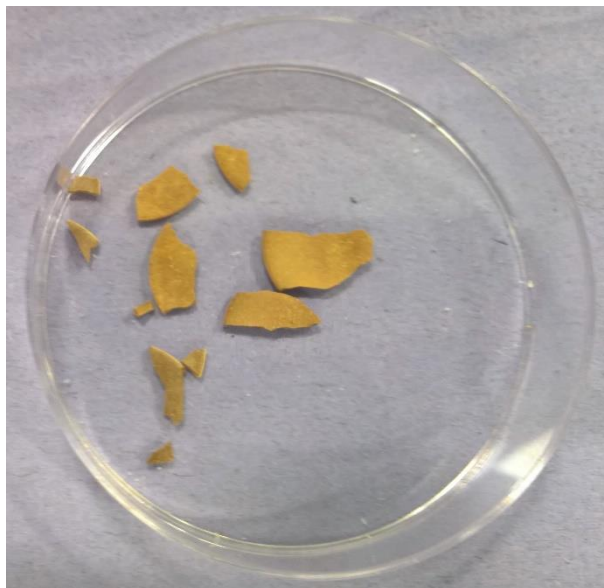

**Figure S3.** Typical fragmentation after drop tests of a pellet prepared compressing MOF-801 blended with 5 wt % sucrose.

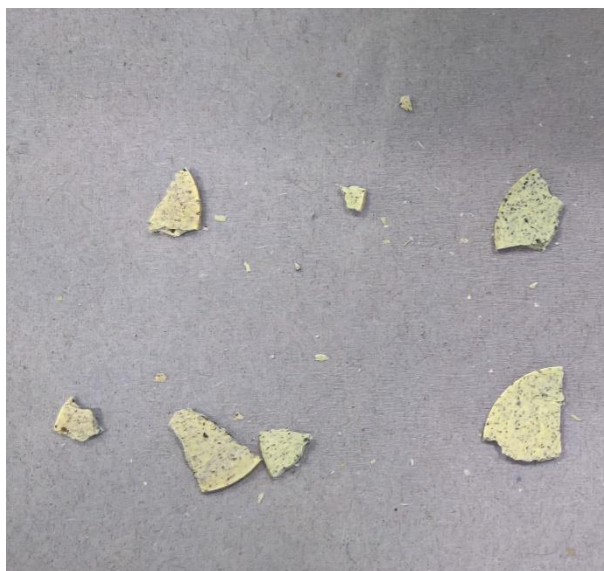

**Figure S4.** Typical fragmentation after drop tests of a pellet prepared compressing MOF-801 blended with 5 wt % PVA.

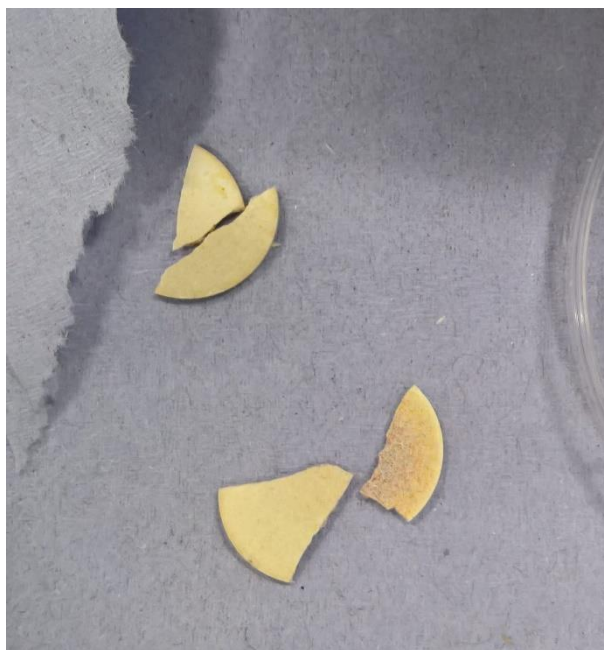

**Figure S5.** Typical fragmentation after drop tests of a pellet prepared compressing MOF-801 blended with 5 wt % PVB.
